# Supplementary material for: Confinement of single polyoxometalate clusters in molecular-scale cages for improved flexible solid-state supercapacitors
Source: Royal Society of Chemistry journal article supplement (doi:10.1039/d0nr01070g), 2020-01-01
Supplement: d0nr01070g1.pdf [file d0nr01070g1.pdf]

**Confinement of Single Polyoxometalate Clusters in Molecular-Scale Cages for  
Improved Flexible Solid-State Supercapacitors**

*Meiling Wang<sup>a,c,1</sup>, Yong Zhang<sup>c,1</sup>, Tianyuan Zhang<sup>d</sup>, Yue Li<sup>a</sup>, Mingzhu Cui<sup>e</sup>, Xun Cao<sup>c</sup>, Yu Lu<sup>c</sup>,*

*Dongdong Peng<sup>c</sup>, Weifeng Liu<sup>a</sup>, Xuguang Liu<sup>a\*</sup>, Tian Wang<sup>tb</sup>, Yizhong Huang<sup>ca</sup>*

<sup>a</sup> *Institute of New Carbon Materials, Taiyuan University of Technology, Taiyuan  
030024, Shanxi, China*

<sup>b</sup> *Department of Chemistry, National University of Singapore, 3 Science Drive 3,  
117543, Singapore*

<sup>c</sup> *School of Materials Science and Engineering, Nanyang Technological University,  
50 Nanyang Avenue, 639798, Singapore*

<sup>d</sup> *Department of Chemistry, University of Washington, Seattle, Washington 98195,  
United States*

<sup>e</sup> *Institute of Crystalline Materials, Shanxi University, Taiyuan, Shanxi 030006, China*

---

\* Corresponding author. Email: [liuxuguang@tyut.edu.cn](mailto:liuxuguang@tyut.edu.cn) \*; [tian.wang91@u.nus.edu](mailto:tian.wang91@u.nus.edu); \* [yzhuang@ntu.edu.sg](mailto:yzhuang@ntu.edu.sg)

<sup>1</sup> Contributed equally to this work.

## **Electrochemical Measurement**

### ***Fabrication of Electrodes in a Traditional Three-Electrode System***

All electrochemical tests were performed in an electrochemical workstation (CHI 760E). In the three electrode tests,  $\text{PMo}_{12}/\text{PPy}/\text{CNT}$  hydrogel dispersion without binder was directly coated on carbon paper (working area  $0.25 \text{ cm}^2$ ), after drying under an infrared lamp, it was used as working electrode. As shown in Figure S9,  $\text{PMo}_{12}/\text{PPy}/\text{CNT}$  ternary hybrid hydrogel can be well dispersed in water, so during the electrode preparation process, no additional binder is required during the coating process, while traditional composite materials require the addition of PVDF as a binder, which is not conductive. And an  $\text{Ag}/\text{AgCl}$  electrode (saturated by 3 M KCl), and a piece of Pt sheet electrode were used as reference and counter electrodes, respectively. Finally, 0.5 M  $\text{H}_2\text{SO}_4$  or 1 M  $[\text{Bmim}]\text{HSO}_4$  aqueous solution were compared as the electrolyte in the electrochemical measurement.

### ***Fabrication of Aqueous Supercapacitor***

Before the two-electrode test,  $\text{PMo}_{12}/\text{PPy}/\text{CNT}$  ternary composite hydrogel dispersion ( $250 \text{ }\mu\text{L}$ ,  $10 \text{ mg/mL}$ ) was evenly coated on carbon paper or carbon cloth (working area  $1 \text{ cm}^2$ ) and dried under infrared lamp. In the liquid-state test, two pieces of as-prepared electrodes ( $1 \text{ cm} \times 2 \text{ cm}$ ) were pressed together with a wet filter soaked with 1 M  $[\text{Bmim}]\text{HSO}_4$  as electrolyte and separator.

### ***Fabrication of Flexible-Solid-State Supercapacitor***

In the two-electrode solid-state test, the wet-separator was replaced with solid PVA/ $[\text{Bmim}]\text{HSO}_4$  gel electrolyte, which was prepared as follows: 2.36 g of  $[\text{Bmim}]\text{HSO}_4$  was added into 10 mL of deionized water, and then 1 g of PVA powder

was added. The mixture was heated to 95°C under stirring until the solution became clear. The hot PVA/[Bmim]HSO<sub>4</sub> gel electrolyte was evenly dropped onto two pieces of as-prepared electrodes with carbon paper or carbon cloth as collector and then pressed together. After the electrolyte cooled and became hard, the thickness of the device was around 0.5 mm for solid-state device with carbon paper as collector and 1 mm for flexible SSC with carbon cloth as collector. Electrochemical impedance spectroscopy (EIS) measurements of PMo<sub>12</sub>/PPy/CNT-SSC and PMo<sub>12</sub>/PPy/CNT hybrid hydrogel-SSC were conducted at amplitude of 5 mV over a frequency range of 0.01 Hz-100 kHz.

To avoid the evaporation of electrolyte, both the LSC and ASC were encapsulated with flexible plastic film. Experiments show that although carbon paper cannot be bent, the SSC constructed with carbon paper as collector has the similar performance as that with carbon cloth as current collector.

CV and GCD measurements were performed at potential ranging from -0.2 to 0.8 V for the three-electrode system. And CV measurements were performed from -0.4 to 0.8 V while GCD measurements from 0 to 0.8 V for the two-electrode liquid-state system. In the two-electrode solid-state system, various voltage ranges (0-1.2 V, 0-1.4 V and 0-1.6 V) were measured for CV and GCD. EIS measurement was conducted for the two-electrode flexible-solid-state system over a frequency range of 100 kHz to 0.01 Hz.

### ***Electrochemical Performance Evaluation***

As for the three-electrode system, the specific capacitance ( $C_m$ ) of

PMo<sub>12</sub>/PPy/CNT gel-based electrodes was evaluated by the following equations

$C_m = \frac{\int IdV}{m\vartheta\Delta V}$  (for CV) and  $C_m = \frac{I\Delta t}{m\Delta V}$  (for GCD), where  $\int IdV$  is the integrating area of CV curves,  $m$  is the mass of active materials,  $\vartheta$  is scan rate,  $\Delta V$  is the potential window after IR drop,  $I$  is discharge current, and  $\Delta t$  is discharge time.

The specific capacitance ( $C_m$ ) and areal capacitance ( $C_a$ ) of the two-electrode systems were calculated according to the following equations  $C_m = \frac{\int IdV}{m\vartheta\Delta V}$  and

$C_a = \frac{\int IdV}{A\vartheta\Delta V}$  (for CV), and  $C_m = 2\frac{I\Delta t}{m\Delta V}$  and  $C_a = 2\frac{I\Delta t}{A\Delta V}$  (for GCD), where  $\int IdV$ ,  $\vartheta$ ,  $\Delta V$  and  $I$  represent same meaning as above. In this case,  $m$  is the mass of active material in single electrode;  $A$  is the active area of single electrode.

The energy density ( $E$ ,  $\mu\text{Wh cm}^{-2}$ ) and power ( $P$ ,  $\mu\text{W cm}^{-2}$ ) of SSCs were determined from GCD curves using the equations  $E = \frac{1}{2} \times \frac{1}{3600} C_a \cdot \Delta V^2$  and

$$P = \frac{3600 \times E}{\Delta t}$$

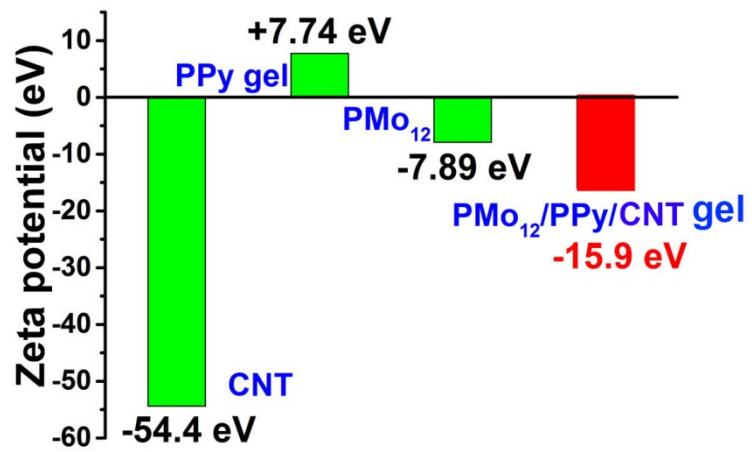

**Figure S1.** Zeta potential of CNT, PPy hydrogel, PMo<sub>12</sub> and PMo<sub>12</sub>/PPy/CNT hybrid hydrogel

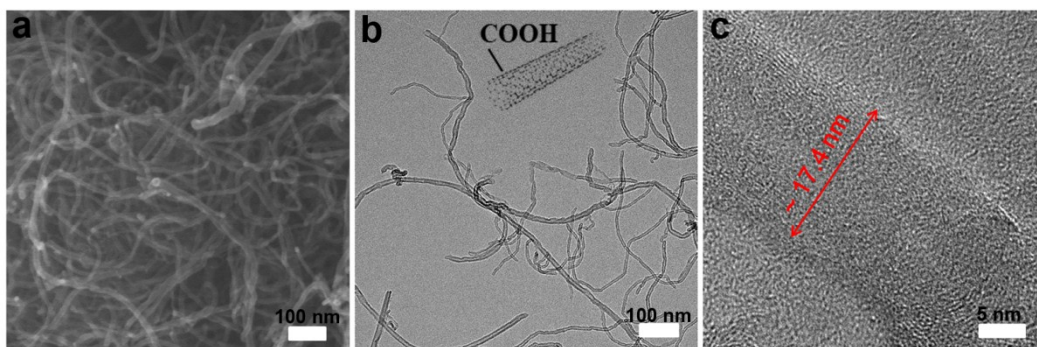

**Figure S2.** SEM (a), TEM (b) and HRTEM images of acidified CNT (c)

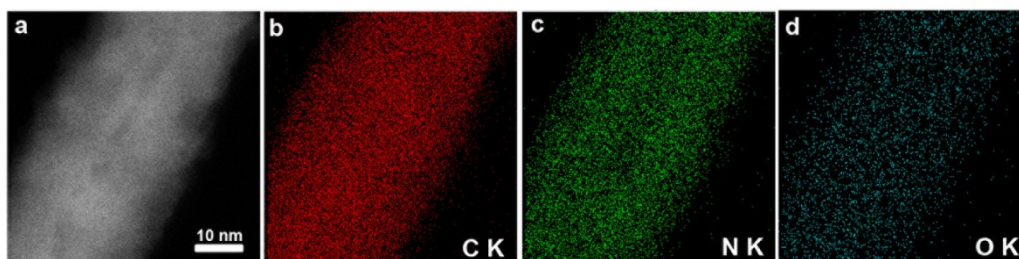

**Figure S3.** STEM-EDS elemental mapping of PPy/CNT hybrid hydrogel

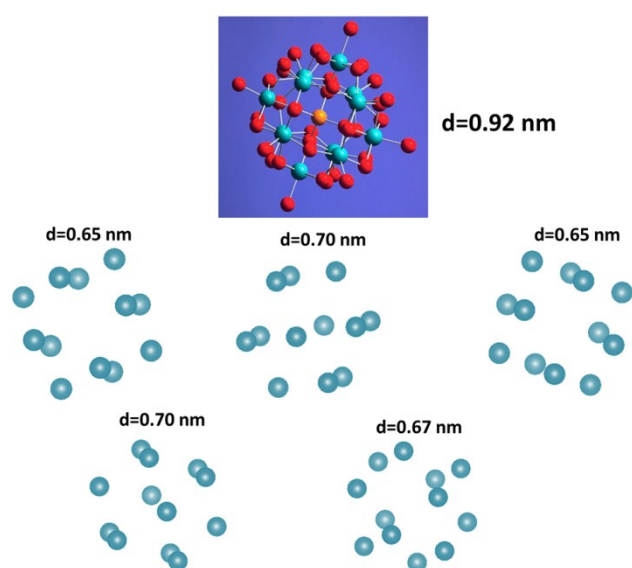

**Figure S4.** (a) Molecular structure of Keggin  $[\text{PMo}_{12}\text{O}_{40}]^{3-}$  cluster, (b)  $\text{PMo}_{12}\text{O}_{40}$  cluster with random orientations (only Mo atoms are visible) deposited on PPy hydrogel wrapped CNT. Blue=Mo, Red=O, Yellow=P.

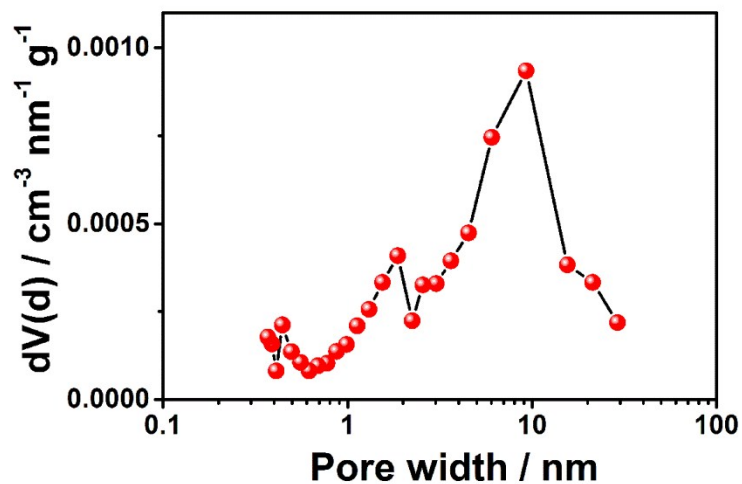

**Figure S5.** The pore-size distribution plot for hybrid hydrogel sample.

Table S1. XPS analysis results of Mo<sub>3d</sub> spectra obtained from PMo<sub>12</sub>/PPy/FCNT hybrid hydrogel and PMo<sub>12</sub>/PPy/FCNT composite

| Binding energy (eV) | Oxidation state      | Area %                               |                                       |        |
|---------------------|----------------------|--------------------------------------|---------------------------------------|--------|
|                     |                      | PMo <sub>12</sub> /PPy/FCNT hydrogel | PMo <sub>12</sub> /PPy/FCNT composite |        |
| 231.9               | Mo 3d <sub>5/2</sub> | 5+                                   | 9.0                                   | 7.9    |
| 233                 |                      | 6+                                   | 50.9                                  | 52.0   |
| 235                 | Mo 3d <sub>3/2</sub> | 5+                                   | 6.0                                   | 5.3    |
| 236.1               |                      | 6+                                   | 33.9                                  | 34.7   |
| FWHM (eV)           |                      |                                      | 1.5 eV                                | 1.4 eV |

FWHM, full-width at half-maximum

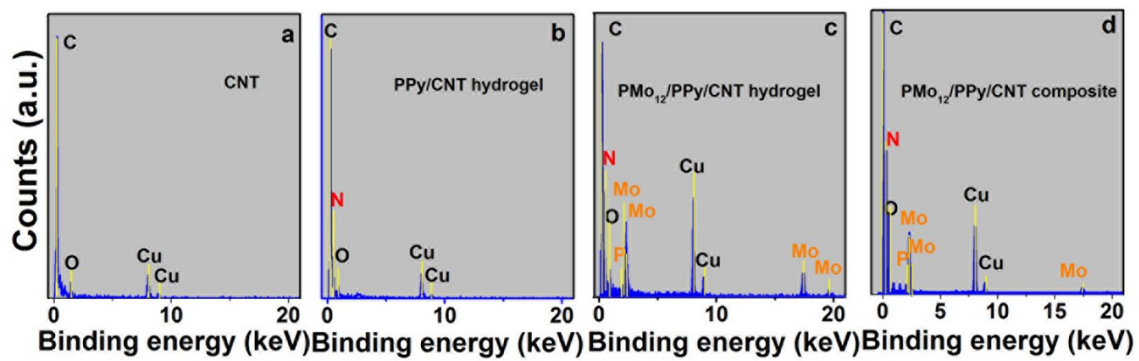

**Figure S6.** Energy dispersive X-ray spectrometry (EDX) spectrum of acidified CNT (a), PPy/CNT hybrid hydrogel (b) and PMo<sub>12</sub>/PPy/CNT hybrid hydrogel (c) and PMo<sub>12</sub>/PPy/CNT composite (d)



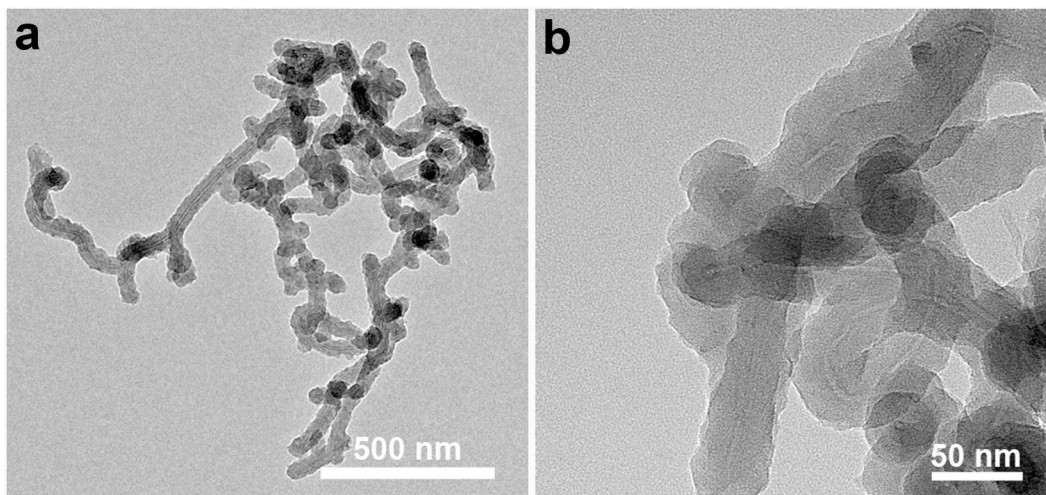

**Figure S7.** TEM images of PPy/CNT hybrid hydrogel at different magnification

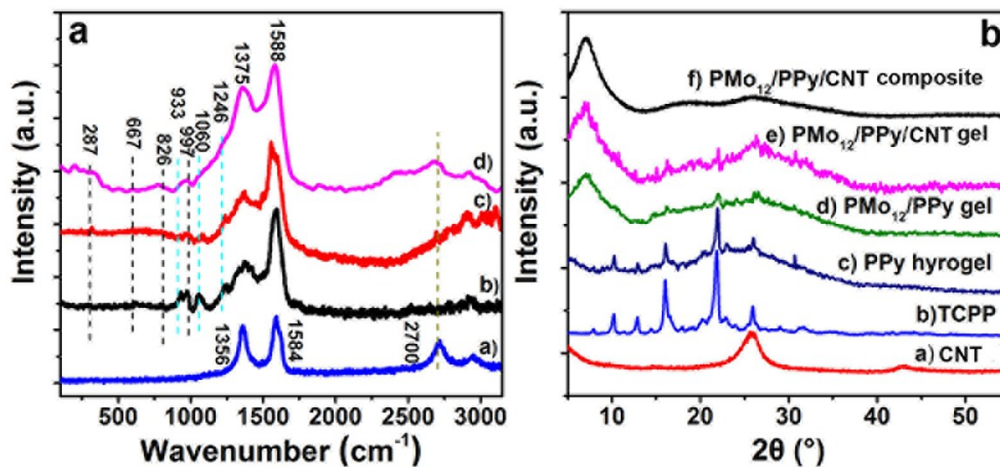

**Figure S8.** (a) Raman spectra of a) CNT, b)  $\text{PMo}_{12}/\text{PPy}$  gel, c)  $\text{PMo}_{12}/\text{PPy}/\text{CNT}$  hybrid hydrogel and d)  $\text{PMo}_{12}/\text{PPy}/\text{CNT}$  hybrids; (b) XRD patterns of a) CNT b) TCPP, c) PPy hydrogel, d)  $\text{PMo}_{12}/\text{PPy}$  hybrid hydrogel, e)  $\text{PMo}_{12}/\text{PPy}/\text{CNT}$  hybrid hydrogel and f)  $\text{PMo}_{12}/\text{PPy}/\text{CNT}$  composite

The structures of PMo<sub>12</sub>/PPy/CNT hybrid hydrogel were characterized by Raman spectra (Figure S8a). The D and G bands and the overtone of D band were observed at 1,356, 1,584 and 2,700 cm<sup>-1</sup>, respectively, in the spectrum of CNT (curve a). In the spectrum of PMo<sub>12</sub>/PPy hybrid hydrogel (curve b), the bands at 1375 and 1588 cm<sup>-1</sup> are ascribed to C=C stretching modes of PPy. Meanwhile, a series of characteristic Raman bands for PPy centered at about 933, 1060, 1246 cm<sup>-1</sup> assigning to C-H out-of-plane deformation, ring deformation and C-H in-plane deformation, respectively, all indicate the successful polymerization of Py. And the TEM image of PMo<sub>12</sub>/PPy hybrid hydrogel (Figure S8) also shows same porous structure as the PPy hydrogel (Figure S9). The two bands at 1375 and 1588 cm<sup>-1</sup> also appear in the spectra of PMo<sub>12</sub>/PPy/CNT ternary hybrid hydrogel (curve c) and PMo<sub>12</sub>/PPy/CNT composite (curve d). However, there are nearly no distinct Raman peaks apart from a weak band at 2700 cm<sup>-1</sup> originating from CNT, implying that the surfaces of CNT in both hybrids are covered. In addition, it can be seen that the four main peaks presented at 997, 826, 667 and 287 cm<sup>-1</sup> are similar in samples arising from loaded PMo<sub>12</sub> (curve b-d), evidencing the structure of PMo<sub>12</sub> integrated into these hybrid materials<sup>1</sup> is preserved during and after the assembly process. This region was totally silent for pristine CNTs.

Figure S8b compares the XRD patterns for different samples. Two hump diffraction peaks at ~26° and ~44° in curve a can be ascribed to the typical graphite-like structure (002) and (100) of CNT, respectively. Curve c shows a broad peak between 20° and 30°, which is consistent with pure PPy, revealing its amorphous nature of PPy hydrogel. It also exhibits some weak characteristic peaks of TCPP

cross-linker as presented in curve b, indicating the doping of TCPP. In contrast to pure PPy hydrogel, P<sub>Mo12</sub>/PPy hydrogel (curve d), P<sub>Mo12</sub>/PPy/CNT hydrogel (curve e) and P<sub>Mo12</sub>/PPy/CNT composite (curve f) all exhibit a new and sharp diffraction peak at 6.7° from P<sub>Mo12</sub><sup>2</sup>. After modification, the characteristic peaks of CNT in P<sub>Mo12</sub>/PPy/CNT hybrid hydrogel and conventional composite become weaker, which is in agreement with Raman results. Also, it should be noted that the characteristic peaks of TCPP are not observed in conventional composite.

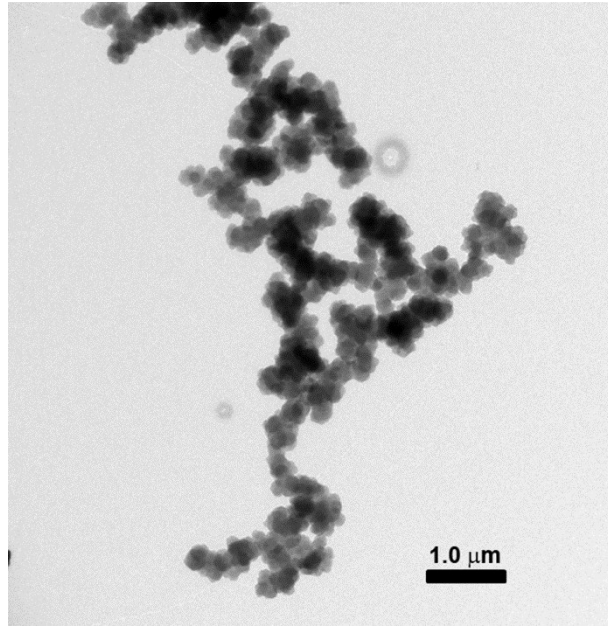

**Figure S9.** TEM image of pure PPy hydrogel

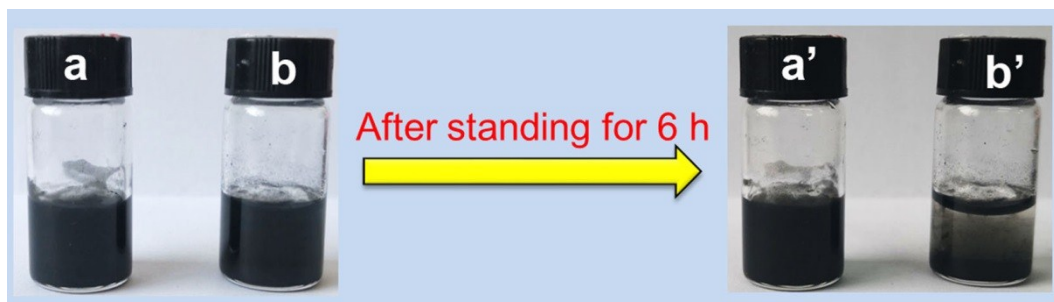

**Figure S10.** Digital photos of PMo<sub>12</sub>/PPy/CNT hybrid hydrogel (a and a') and conventional PMo<sub>12</sub>/PPy/CNT composite (b and b') after ultrasounding in water for 30 min (a and b) and continue standing for 6 h (a' and b')

PMo<sub>12</sub>/PPy/CNT ternary hybrid hydrogel can be well dispersed, which has been demonstrated by no precipitation in water even after standing for 6 h, indicating its higher hydrophilicity of the hybrid hydrogel. Because of this, we have created a more uniform coating during the electrode preparation process, and no additional binder is required during the coating process, while traditional composite materials also require the addition of PVDF as a binder, which is not conductive. Not only will it cover the active site, but it will also block proton and electron transport. This preparation method simplifies the preparation process, and also eliminates substances that may block and transport electrons, thereby increasing conductivity.

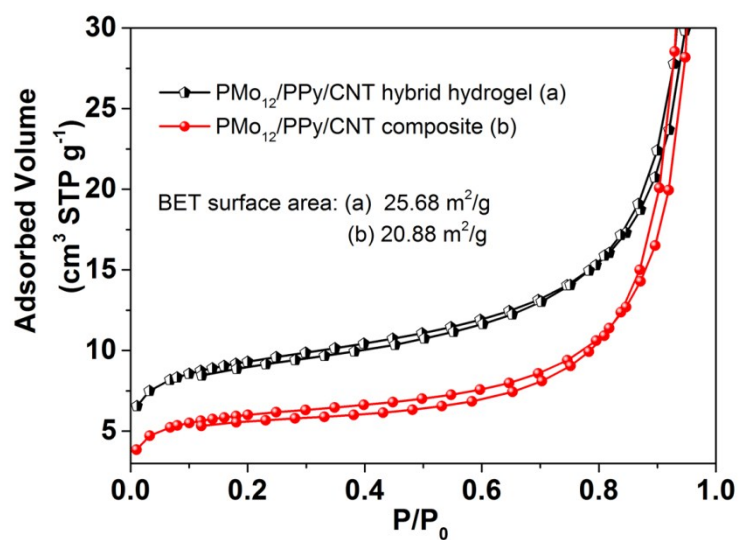

**Figure S11.** Nitrogen sorption isotherm of hybrid hydrogel and conventional composite

The N<sub>2</sub> adsorption-desorption isotherm plots show that the Brunauer-Emmett-Teller (BET) specific surface area of PMo<sub>12</sub>/PPy/CNT ternary hybrid hydrogel is higher than that of conventional composite when the loading amount of PMo<sub>12</sub> is the same. The fishnet-like PPy hydrogel may make contribution.

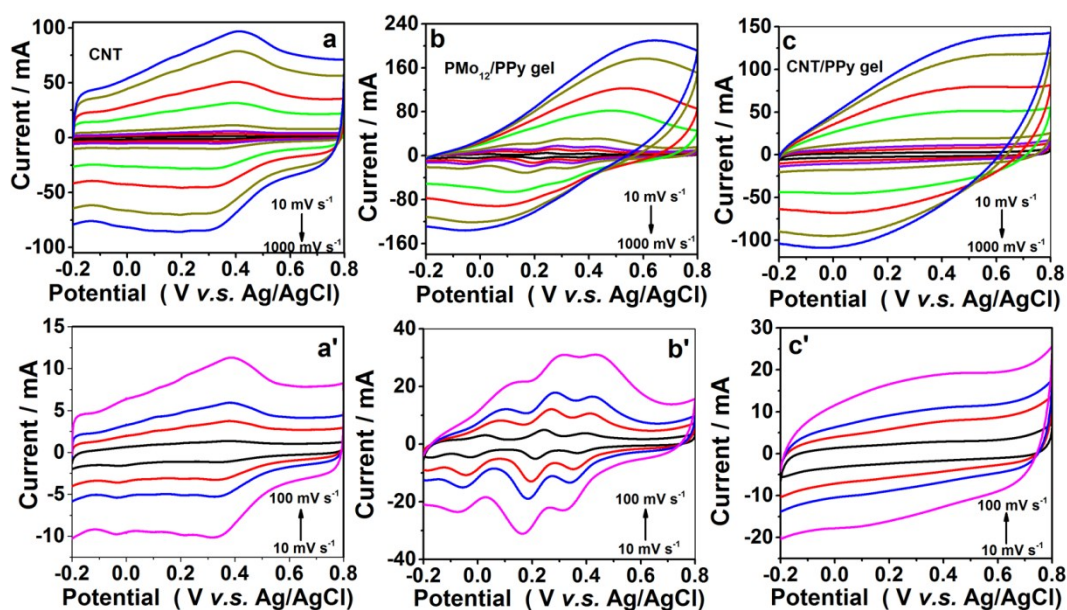

**Figure S12.** CV curves of CNT (a, a'), PMo<sub>12</sub>/PPy gel (b, b') and PPy/CNT gel (c, c') at scan rates of 10, 30, 50, 100, 300, 500, 800, 1000 mV/s in 0.5 M H<sub>2</sub>SO<sub>4</sub> solution

A wide reversible hump is observed in Figure S12A, suggesting a large faradaic contribution to the overall performance due to the doping of O<sup>3</sup>. The regular shape keeps unchanged obviously with the increase of scan rate even to 1000 mV s<sup>-1</sup>, implying a fast charge/discharge process<sup>4</sup>. However, it is found that for both PMo<sub>12</sub>/PPy gel (Figure S12b, b') and PPy/CNT gel (Figure S12c, c'), good capacitance behavior occurs in range from 10 to 100 mV s<sup>-1</sup> and the waves are unevenly shaped with the further increase of scan rate.



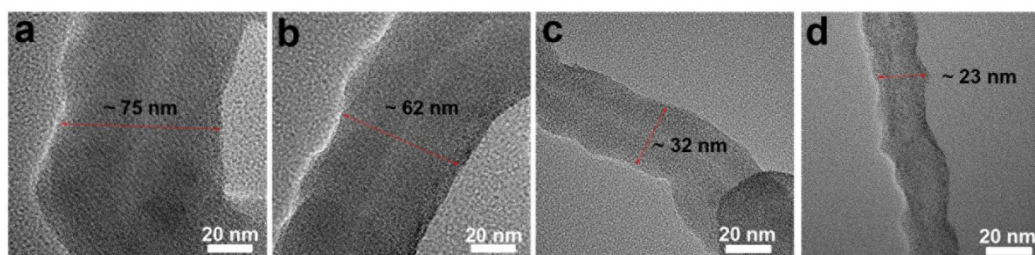

Figure S13. TEM images of (a)  $\text{PMo}_{12}/\text{PPy}/\text{CNT}_5$  gel, (b)  $\text{PMo}_{12}/\text{PPy}/\text{CNT}_{10}$  gel, (c)  $\text{PMo}_{12}/\text{PPy}/\text{CNT}_{15}$  gel and (d)  $\text{PMo}_{12}/\text{PPy}/\text{CNT}_{20}$  gel

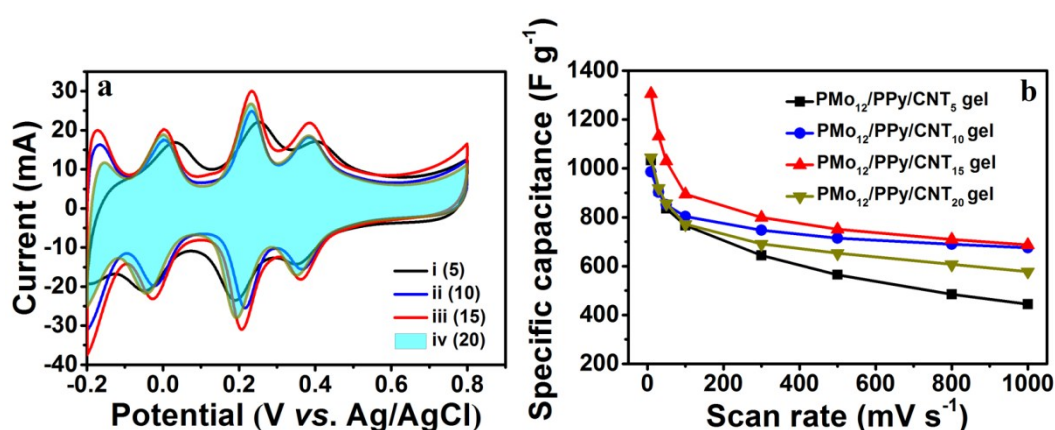

Figure S14. (a) CV curves of  $\text{PMo}_{12}/\text{PPy}/\text{CNT}$  ternary hybrid hydrogel with different amounts of CNT: (i)  $\text{PMo}_{12}/\text{PPy}/\text{CNT}_5$  gel, (ii)  $\text{PMo}_{12}/\text{PPy}/\text{CNT}_{10}$  gel, (iii)  $\text{PMo}_{12}/\text{PPy}/\text{CNT}_{15}$  gel and (iv)  $\text{PMo}_{12}/\text{PPy}/\text{CNT}_{20}$  gel at  $50 \text{ mV s}^{-1}$ ; the plots of related specific capacitances versus scan rate

Figure S12 shows the TEM images of  $\text{PMo}_{12}/\text{PPy}/\text{CNT}_5$  gel,  $\text{PMo}_{12}/\text{PPy}/\text{CNT}_{10}$  gel,  $\text{PMo}_{12}/\text{PPy}/\text{CNT}_{15}$  gel and  $\text{PMo}_{12}/\text{PPy}/\text{CNT}_{20}$  gel, which are named according to the amount of CNT introduced. It can be found that the more the amount of CNT, the thinner the coated PPy hydrogel. Figure S13 depicts the influence of CNT on the



specific capacitance of ternary hybrid hydrogel. It can be seen from the Figure S13a that all the CVs of ternary hybrid hydrogels doped with different amounts of CNT reveal three characteristic redox peaks and the redox current of three peaks increases with the incensement of the mass content of CNT from 5 to 15 wt%, indicating an improved enhancement effect for that the addition of CNT can increase the conductivity, but too much CNT pulls down the total capacitance as a result of its relatively low intrinsic capacitance. Based on the CV curves at different scan rates, the specific capacitance of ternary hybrid hydrogels doped with different amount of CNT is calculated. The related plots of specific capacitance versus scan rate are shown in Figure S13b.  $\text{PMo}_{12}/\text{PPy}/\text{CNT}_{15}$  gel shows highest capacitance performance. So the optimized  $\text{PMo}_{12}/\text{PPy}/\text{CNT}_{15}$  gel is chosen in our study.

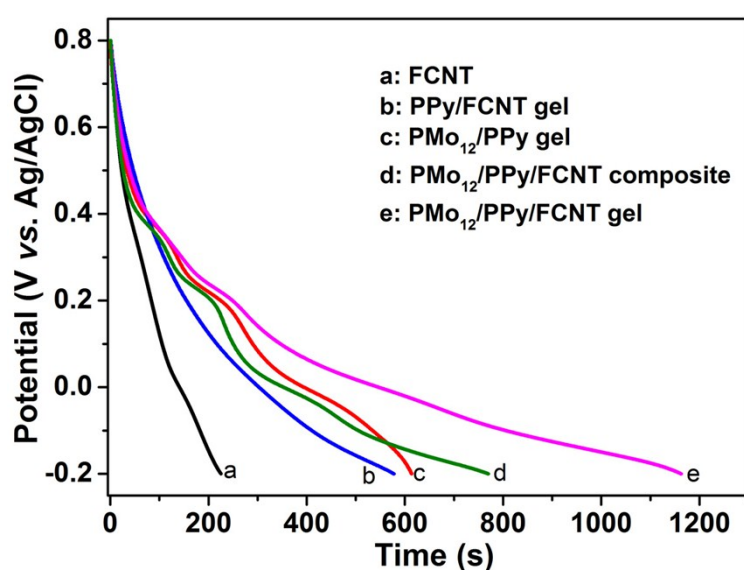

**Figure S15.** GCD curves of these active materials at current density of  $1 \text{ A g}^{-1}$

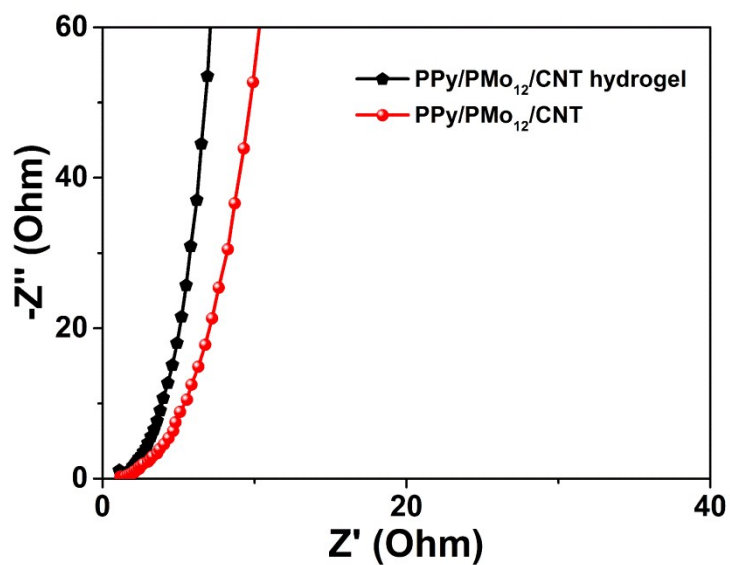

Figure S16. EIS diagram of hybrid hydrogel and conventional composite in three electrode system

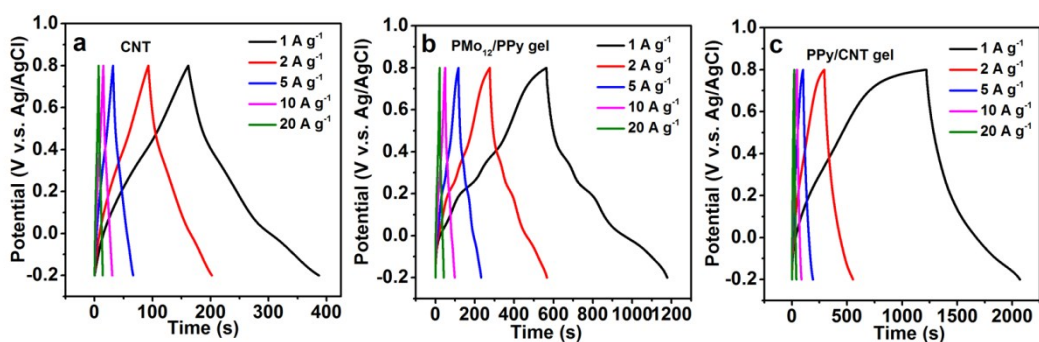

Figure S17. Galvanostatic charge-discharge curves CNT (a), PMo<sub>12</sub>/PPy gel (b) and PPy/CNT gel (c) in 0.5 M H<sub>2</sub>SO<sub>4</sub> solution

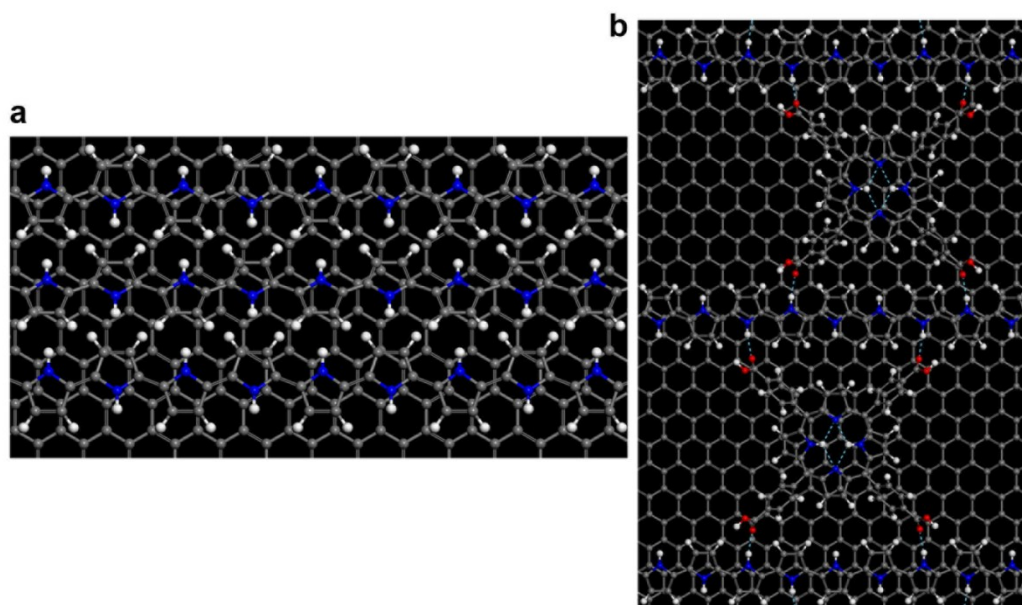

**Figure S18.** DFT optimized geometries of PPy on carbon mono layer (a) and PPy on carbon mono layer doped by TCPP cross-linker (b)

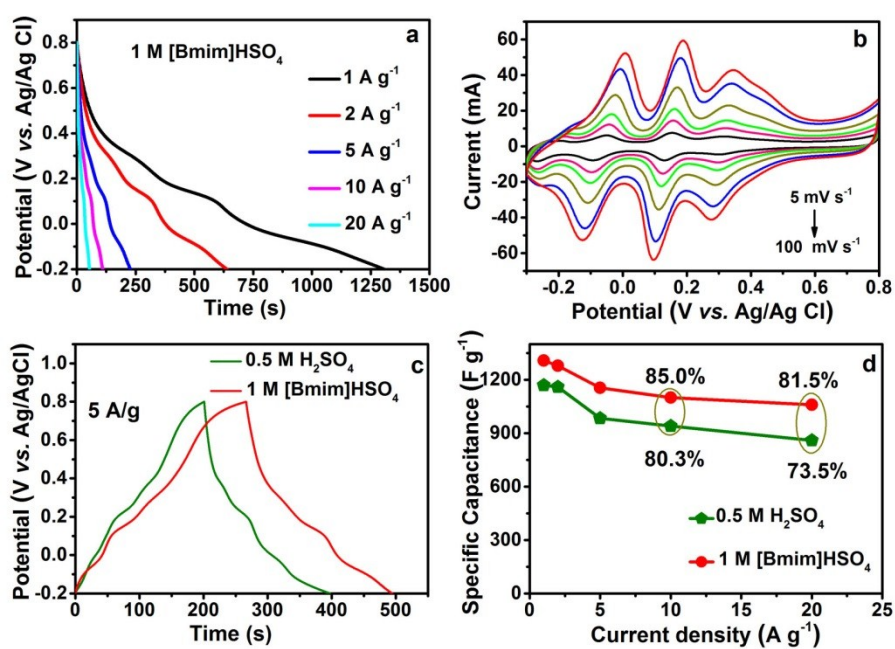

**Figure S19.** GCD branch (a) and CV curves (b) of PMo<sub>12</sub>/PPy/CNT hydrogel electrode in 1 M [Bmim]HSO<sub>4</sub> aqueous solutions; (c) GCD curves of PMo<sub>12</sub>/PPy/CNT hydrogel electrode in 0.5 M H<sub>2</sub>SO<sub>4</sub> and 1 M [Bmim]HSO<sub>4</sub> at 5A g<sup>-1</sup>; (d) Specific capacitances of PMo<sub>12</sub>/PPy/CNT hydrogel electrode in different electrolytes at various current densities

**Table S2.** Comparison of specific capacitance of PMo<sub>12</sub>/PPy/CNT hybrid hydrogel with other reported POMs-based composite materials

| Materials                                                                                                                                  | Electrolyte                                                         | Current density/Scan rate | Specific capacitance       | Ref. |
|--------------------------------------------------------------------------------------------------------------------------------------------|---------------------------------------------------------------------|---------------------------|----------------------------|------|
| PMo <sub>12</sub> /PPy/CNT gel                                                                                                             | 0.5 M H <sub>2</sub> SO <sub>4</sub>                                | 1 A g <sup>-1</sup>       | 1170 F g <sup>-1</sup>     | Ours |
| PMo <sub>12</sub> /PPy/CNT gel                                                                                                             | 1 M [Bmim]HSO <sub>4</sub>                                          | 1 A g <sup>-1</sup>       | 1308 F g <sup>-1</sup>     | Ours |
| MoS/rGO                                                                                                                                    | 0.5MNa <sub>2</sub> SO <sub>4</sub> +H <sub>2</sub> SO <sub>4</sub> | 10 mV s <sup>-1</sup>     | 870 F g <sup>-1</sup>      | 5    |
| NENU-5/PPy-0.15                                                                                                                            | 3M KCl                                                              | 10 mV/s                   | 779.8 F g <sup>-1</sup>    | 6    |
| CDs-PMo <sub>12</sub> -PANI                                                                                                                | 1 M H <sub>2</sub> SO <sub>4</sub>                                  | 1 A g <sup>-1</sup>       | 479 F g <sup>-1</sup>      | 7    |
| PMo <sub>12</sub> /PANI/TiN NWA                                                                                                            | 1 M H <sub>2</sub> SO <sub>4</sub>                                  | 1 A g <sup>-1</sup>       | 469 F g <sup>-1</sup>      | 8    |
| SWCNT-TBA-PV <sub>2</sub> Mo <sub>10</sub>                                                                                                 | 1 M H <sub>2</sub> SO <sub>4</sub>                                  | 10 mV s <sup>-1</sup>     | 444 F g <sup>-1</sup>      | 9    |
| PIL/POM/RGO                                                                                                                                | 0.5 M H <sub>2</sub> SO <sub>4</sub>                                | 1 A g <sup>-1</sup>       | 443 F g <sup>-1</sup>      | 10   |
| MXene-PIL-POM                                                                                                                              | 0.5 M H <sub>2</sub> SO <sub>4</sub>                                | 1 A g <sup>-1</sup>       | 384.6 F g <sup>-1</sup>    | 11   |
| Pinecone AC/PMo <sub>12</sub>                                                                                                              | 1 M H <sub>2</sub> SO <sub>4</sub>                                  | 10 mV s <sup>-1</sup>     | 361 F g <sup>-1</sup>      | 12   |
| PPy-PMo <sub>12</sub> /rGO                                                                                                                 | 0.5 M H <sub>2</sub> SO <sub>4</sub>                                | 1 A g <sup>-1</sup>       | 295 F g <sup>-1</sup>      | 2    |
| Cs-PMo <sub>12</sub> /CNT                                                                                                                  | Nafion+1 M H <sub>2</sub> SO <sub>4</sub>                           | 0.2 A g <sup>-1</sup>     | 285 F g <sup>-1</sup>      | 13   |
| PMo <sub>12</sub> -PANI                                                                                                                    | ---                                                                 | 20 mV/s                   | 363.5 F g <sup>-1</sup>    | 14   |
| PMo <sub>12</sub> @PPy                                                                                                                     | 1 M H <sub>2</sub> SO <sub>4</sub>                                  | 2 mA/cm <sup>2</sup>      | 294.1 F g <sup>-1</sup>    | 15   |
| AC@PMo <sub>12</sub>                                                                                                                       | 1 M[Bmim]HSO <sub>4</sub>                                           | 1 mV/s                    | 223 F g <sup>-1</sup>      | 16   |
| PMo <sub>12</sub> /PANI                                                                                                                    | ---                                                                 | 1 A g <sup>-1</sup>       | 376                        | 17   |
| (GO/PMo) <sub>20,96</sub>                                                                                                                  | 0.5 M H <sub>2</sub> SO <sub>4</sub>                                | 10 mV/s                   | 207 F g <sup>-1</sup>      | 18   |
| GeMo <sub>12</sub> -SiMo <sub>12</sub> -MWCNT                                                                                              | 1 M H <sub>2</sub> SO <sub>4</sub>                                  | 100 mV s <sup>-1</sup>    | 191.2 F cm <sup>-3</sup>   | 19   |
| PAni-0.5%PMo <sub>12</sub>                                                                                                                 | 1 M H <sub>2</sub> SO <sub>4</sub>                                  | 1 mA cm <sup>-2</sup>     | 172.38 F g <sup>-1</sup>   | 20   |
| rGO-PMo <sub>12</sub>                                                                                                                      | 1 M H <sub>2</sub> SO <sub>4</sub>                                  | 5 A g <sup>-1</sup>       | 299 F g <sup>-1</sup>      | 21   |
| RGO/PMo <sub>12</sub>                                                                                                                      | 1 M H <sub>2</sub> SO <sub>4</sub>                                  | 10 mV s <sup>-1</sup>     | 276 F g <sup>-1</sup>      | 22   |
| AC/PW <sub>12</sub> O <sub>40</sub>                                                                                                        | 1 M H <sub>2</sub> SO <sub>4</sub>                                  | 10 mV s <sup>-1</sup>     | 254 F g <sup>-1</sup>      | 23   |
| HPW/RGO                                                                                                                                    | 5 M H <sub>2</sub> SO <sub>4</sub>                                  | 1 A g <sup>-1</sup>       | 154.4 F g <sup>-1</sup>    | 24   |
| [Ag <sub>5</sub> (brtmb) <sub>4</sub> ][VW <sub>10</sub> V <sub>2</sub> O <sub>40</sub> ]                                                  | 1 M H <sub>2</sub> SO <sub>4</sub>                                  | 110 A g <sup>-1</sup>     | 206 F g <sup>-1</sup>      | 25   |
| Na <sub>6</sub> V <sub>10</sub> O <sub>28</sub>                                                                                            | 1m LiClO <sub>4</sub>                                               | 0.1 A g <sup>-1</sup>     | 354 F g <sup>-1</sup>      | 26   |
| AC/P <sub>2</sub> Mo <sub>18</sub>                                                                                                         | 1 M H <sub>2</sub> SO <sub>4</sub>                                  | 6 A g <sup>-1</sup>       | 275 F g <sup>-1</sup>      | 27   |
| PMoW-PDDA-RGO                                                                                                                              | 1 M H <sub>2</sub> SO <sub>4</sub>                                  | 1 A g <sup>-1</sup>       | 279.1 F g <sup>-1</sup>    | 28   |
| (H <sub>2</sub> bpe)(Hbpe) <sub>2</sub> {[Cu(pzta)(H <sub>2</sub> O)]}[P <sub>2</sub> W <sub>18</sub> O <sub>62</sub> ]}·5H <sub>2</sub> O | 1 M H <sub>2</sub> SO <sub>4</sub>                                  | 5 A g <sup>-1</sup>       | 168 F g <sup>-1</sup>      | 29   |
| [Ru(bpy) <sub>3</sub> ] <sub>3</sub> PMo <sub>18</sub> O <sub>62</sub> ·nH <sub>2</sub> O                                                  | -                                                                   | 0.2 A g <sup>-1</sup>     | 68 F g <sup>-1</sup>       | 30   |
| [Ru(bpy) <sub>3</sub> ] <sub>3.33</sub> PMo <sub>18</sub> O <sub>62</sub> mH <sub>2</sub> O                                                | 0.25 M total salt                                                   | 0.2 A g <sup>-1</sup>     | 125 F g <sup>-1</sup>      | 30   |
| [PW <sub>11</sub> CoO <sub>39</sub> ] <sub>5</sub> -@Ru-rGO                                                                                | 0.5 M HOAC                                                          | 0.2 A g <sup>-1</sup>     | 624 F g <sup>-1</sup>      | 31   |
| [PW <sub>11</sub> NiO <sub>39</sub> ] <sub>5</sub> -@Ru-rGO                                                                                | 0.5 M HOAC                                                          | 0.2 A g <sup>-1</sup>     | 568 F g <sup>-1</sup>      | 31   |
| [PW <sub>11</sub> CuO <sub>39</sub> ] <sub>5</sub> -@Ru-rGO                                                                                | 0.5 M HOAC                                                          | 0.2 A g <sup>-1</sup>     | 705 F g <sup>-1</sup>      | 31   |
| AC/PMo <sub>12</sub>                                                                                                                       | 1 M H <sub>2</sub> SO <sub>4</sub>                                  | 2 A g <sup>-1</sup>       | 160 /183 F g <sup>-1</sup> | 32   |
| {Ag <sub>5</sub> (pz) <sub>7</sub> }(BW <sub>12</sub> O <sub>40</sub> )                                                                    | 1 M H <sub>2</sub> SO <sub>4</sub>                                  | 2.16 A g <sup>-1</sup>    | 1058 F g <sup>-1</sup>     | 33   |
| {Ag <sub>5</sub> (pz) <sub>7</sub> }(SiW <sub>12</sub> O <sub>40</sub> )(OH)·H <sub>2</sub> O                                              | 1 M H <sub>2</sub> SO <sub>4</sub>                                  | 2.16 A g <sup>-1</sup>    | 986 F g <sup>-1</sup>      | 33   |
| (Hpyr)[{Ag(pz)} <sub>2</sub> (PMo <sub>12</sub> O <sub>40</sub> )                                                                          | 1 M H <sub>2</sub> SO <sub>4</sub>                                  | 2.16 A g <sup>-1</sup>    | 1611 F g <sup>-1</sup>     | 33   |
| POM-Ppy/nanopillar                                                                                                                         | 0.05 M H <sub>2</sub> SO <sub>4</sub>                               | 1mA cm <sup>-2</sup>      | 77.0 mF cm <sup>-2</sup>   | 34   |
| {Mo <sub>132</sub> }-rGO                                                                                                                   | 1 M Li <sub>2</sub> SO <sub>4</sub>                                 | 5A g <sup>-1</sup>        | 617.3 F g <sup>-1</sup>    | 35   |
| HT-RGO-PMo <sub>12</sub>                                                                                                                   | 1 M H <sub>2</sub> SO <sub>4</sub>                                  | 10 mV s <sup>-1</sup>     | 276 F g <sup>-1</sup>      | 36   |
| Mo <sub>132</sub> -DTAB-EEG                                                                                                                | 1 M H <sub>2</sub> SO <sub>4</sub>                                  | 1 mV s <sup>-1</sup>      | 65 F g <sup>-1</sup>       | 37   |
| GO/PMo <sub>12</sub>                                                                                                                       | 1 M H <sub>2</sub> SO <sub>4</sub>                                  | 10 mV s <sup>-1</sup>     | 207 F g <sup>-1</sup>      | 38   |
| Co-POM/rGO                                                                                                                                 | 1 M H <sub>2</sub> SO <sub>4</sub>                                  | 0.5A g <sup>-1</sup>      | 211.3 F g <sup>-1</sup>    | 39   |

**Table S3.** Comparison of specific capacitance of PPy/PMo<sub>12</sub>/CNT ternary hybrid hydrogel-based liquid-state supercapacitor (LSC) with other reported LSCs made of POMs-based composites electrodes

| Materials                                       | Device     | Electrolyte                          | Current density<br>/Scan rate | Specific<br>capacitance    | Ref. |
|-------------------------------------------------|------------|--------------------------------------|-------------------------------|----------------------------|------|
| PMo <sub>12</sub> /PPy/CNT gel                  | Symmetric  | 1 M [Bmim]HSO <sub>4</sub>           | 1 mA cm <sup>-2</sup>         | 577.74 mF cm <sup>-2</sup> | Ours |
| PMo <sub>12</sub> /PPy/CNT gel                  | Symmetric  | 1 M [Bmim]HSO <sub>4</sub>           | 10 mV s <sup>-1</sup>         | 272.0 F g <sup>-1</sup>    | Ours |
| PMo <sub>12</sub> @PPy                          | Symmetric  | 1 M H <sub>2</sub> SO <sub>4</sub>   | 5 mA cm <sup>-2</sup>         | 71.6 mF cm <sup>-2</sup>   | 15   |
| SWCNT-TBA-PV <sub>2</sub> Mo <sub>10</sub>      | Symmetric  | 1 M H <sub>2</sub> SO <sub>4</sub>   | 1 mA cm <sup>-2</sup>         | 224 mF cm <sup>-2</sup>    | 9    |
| PMo <sub>12</sub> /MWCNT                        | Symmetric  | 1 M H <sub>2</sub> SO <sub>4</sub>   | 1 A g <sup>-1</sup>           | 40 F g <sup>-1</sup>       | 40   |
| PMo <sub>12</sub> /PPy//PW <sub>12</sub> /PEDOT | Asymmetric | 0.5 M H <sub>2</sub> SO <sub>4</sub> | 1 mA g <sup>-1</sup>          | 31 F g <sup>-1</sup>       | 41   |
| PMo <sub>12</sub> /PAni                         | Symmetric  | 0.5 M H <sub>2</sub> SO <sub>4</sub> | 0.05 mA cm <sup>-2</sup>      | 195 mF cm <sup>-2</sup>    | 42   |
| rGO-PMo <sub>12</sub> //rGO-PW <sub>12</sub>    | Asymmetric | 1 M H <sub>2</sub> SO <sub>4</sub>   | 2 mA cm <sup>-2</sup>         | 110.9 F g <sup>-1</sup>    | 21   |
| PIL/POM/RGO                                     | Symmetric  | 0.5 M H <sub>2</sub> SO <sub>4</sub> | 0.5 A g <sup>-1</sup>         | 408 F g <sup>-1</sup>      | 10   |
| {Mo <sub>132</sub> }-rGO                        | Asymmetric | 1 M LiSO <sub>4</sub>                | 0.2 A g <sup>-1</sup>         | 52.7 F g <sup>-1</sup>     | 35   |
| AC/PMo <sub>12</sub>                            | Symmetric  | 1 M H <sub>2</sub> SO <sub>4</sub>   | 1A g <sup>-1</sup>            | 45 F g <sup>-1</sup>       | 32   |
| HT-RGO-PMo <sub>12</sub>                        | Symmetric  | 1 M H <sub>2</sub> SO <sub>4</sub>   | 1A g <sup>-1</sup>            | 123 F g <sup>-1</sup>      | 36   |
| PMoW-PDDA-RGO                                   | Symmetric  | 1M H <sub>2</sub> SO <sub>4</sub>    | 1A g <sup>-1</sup>            | 177 F g <sup>-1</sup>      | 28   |
| Cs-PMo <sub>12</sub> /CNT                       | Symmetric  | 1 M H <sub>2</sub> SO <sub>4</sub>   | 1 A g <sup>-1</sup>           | 30 F g <sup>-1</sup>       | 13   |

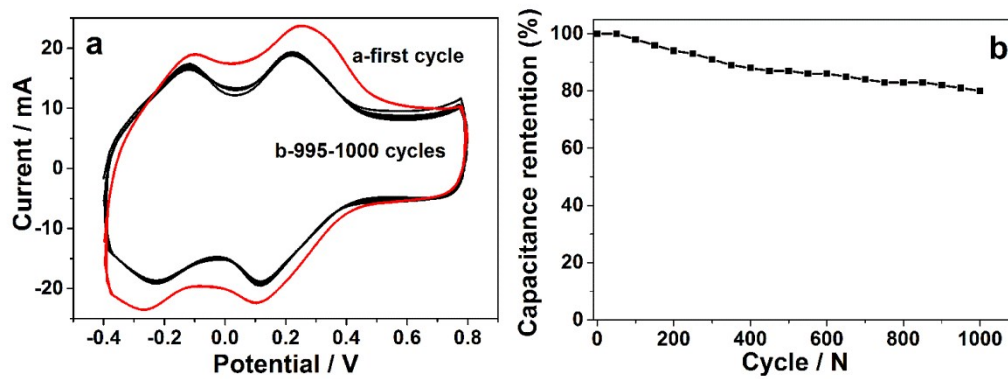

**Figure S20.** 1000 cycles continuous CV tests of  $\text{PMo}_{12}/\text{PPy}/\text{CNT}$  gel-based LSC (a) and corresponding cycle life

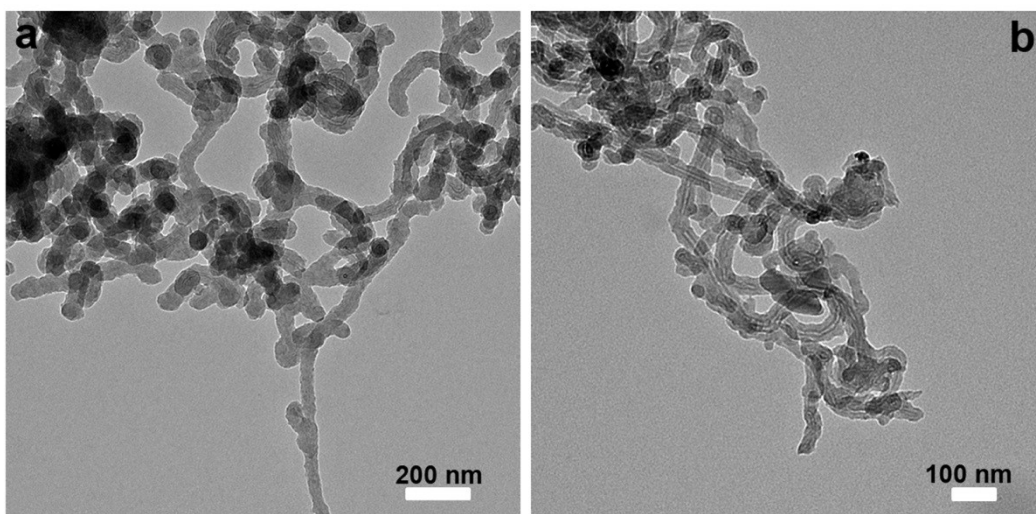

**Figure S21.** HRTEM images of  $\text{PMo}_{12}$ /PPy/CNT hybrid hydrogel before and after 605 CV cycles

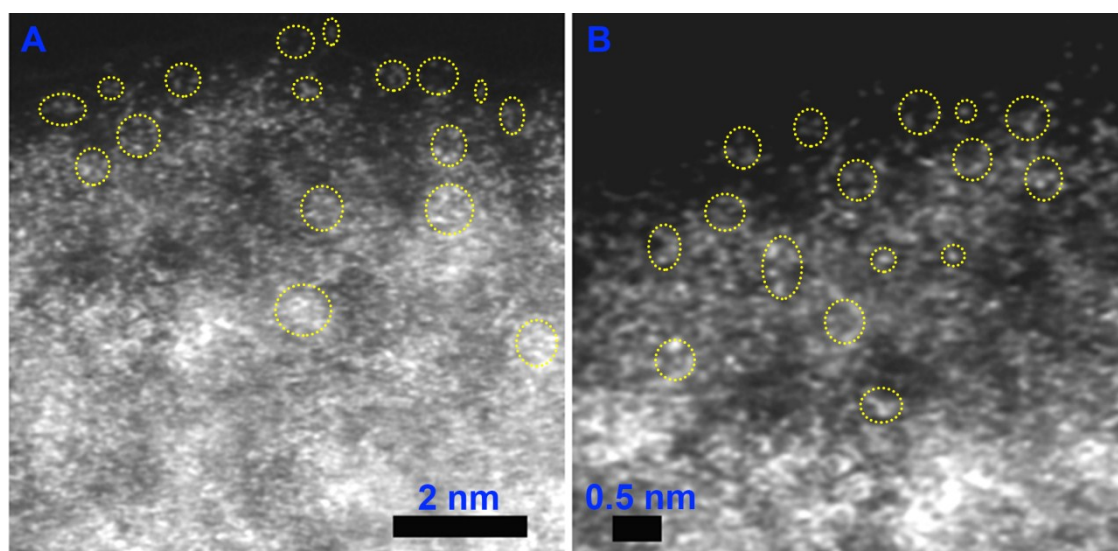

**Figure S22.** HADDF-STEM images of  $\text{PMo}_{12}$ /PPy/CNT hybrid hydrogel before and after 605 CV cycles



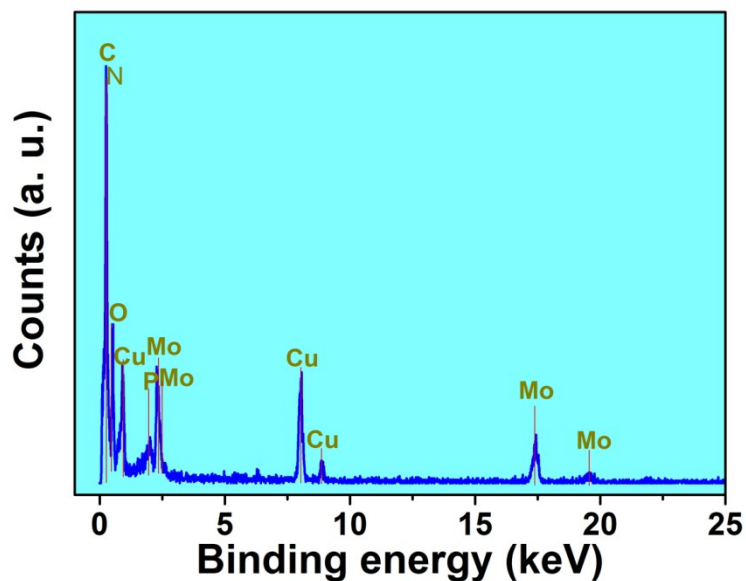

**Figure S23.** Energy dispersive X-ray spectrometry (EDX) spectrum of  $\text{PMo}_{12}/\text{PPy}/\text{CNT}$  hybrid hydrogel after 605 CV cycles

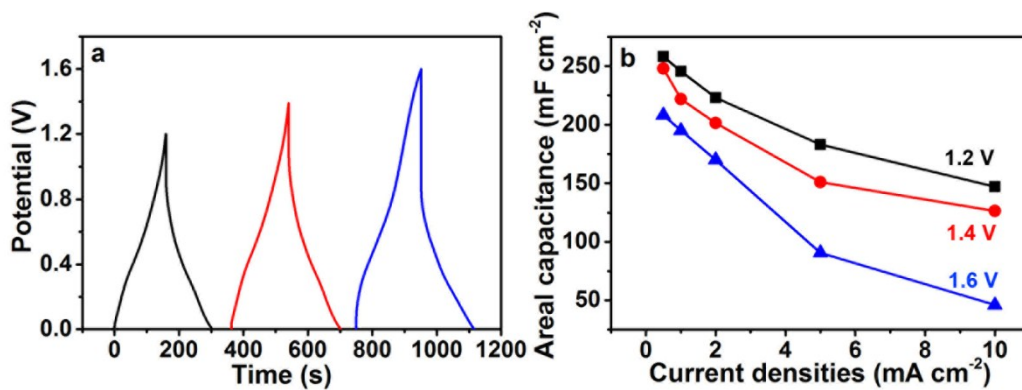

**Figure S24.** GCD cycles for  $\text{PMo}_{12}/\text{PPy}/\text{CNT}$  hydrogel-based SSC in the voltage windows of 0-1.2 V, 0-1.4 V and 0-1.6 V at current density of  $1.0 \text{ mA cm}^{-2}$  (a); Specific capacitances of SSCs in different voltage windows at various current densities (b)



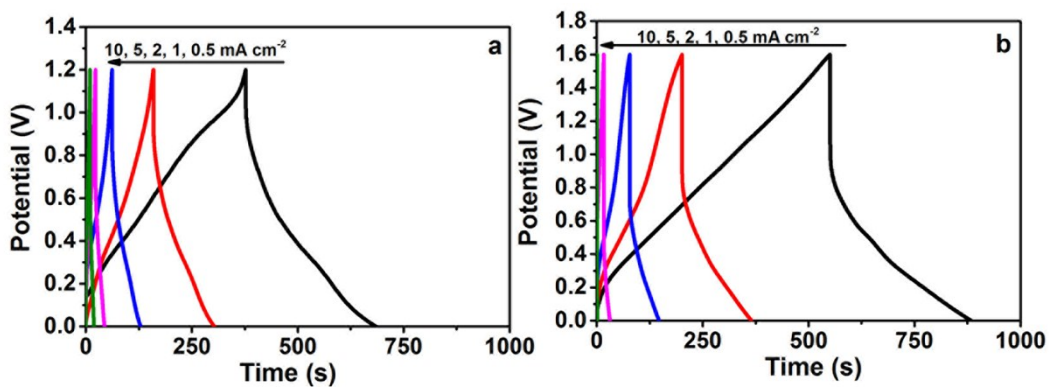

**Figure 25.** GCD cycles for  $\text{PMo}_{12}/\text{PPy}/\text{CNT}$  hydrogel-based SSC in the voltage windows of 0-1.2 V and 0-1.6 V

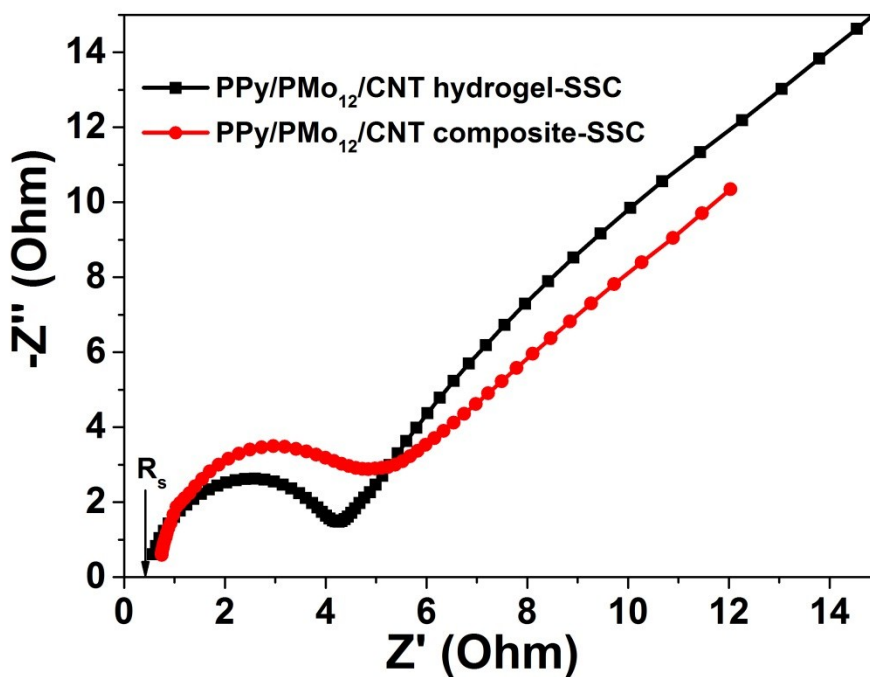

**Figure S26.** Nyquist plots of two-electrode solid device based on  $\text{PPy}/\text{PMo}_{12}/\text{CNT}$  ternary hybrid hydrogel and conventional  $\text{PPy}/\text{PMo}_{12}/\text{CNT}$  composite

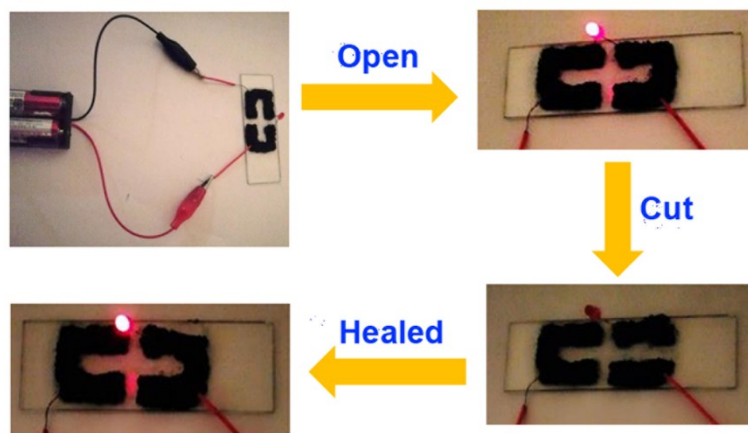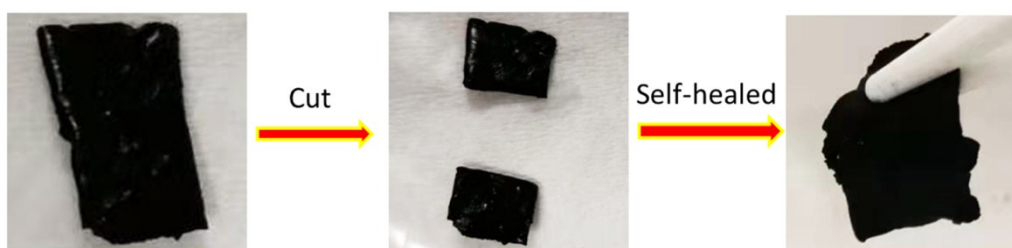

**Figure S27.** Pictures showing that the PPy hydrogel is conductive and flexible

The high conductivity and flexibility of  $\text{PMo}_{12}/\text{PPy}/\text{CNT}$  gel were also studied by designing a complete circuit including an LED bulb, in which  $\text{PMo}_{12}/\text{PPy}/\text{CNT}$  gel as the conductor and two dry batteries (1.5 V) as the power source. The bulb was successfully lighted when the circuit was switched to close status, indicating the high conductivity of our hybrid gel. In the test, the right side of  $\text{PMo}_{12}/\text{PPy}/\text{CNT}$  hybrid gel was cut and the circuit then became open and the bulb was extinguished. After that the circuit was re-established, and the LED bulb could be lighted up again, showing good conductivity of  $\text{PMo}_{12}/\text{PPy}/\text{CNT}$  hybrid gel. In addition, the hybrid hydrogel can self-heal after being cut off.

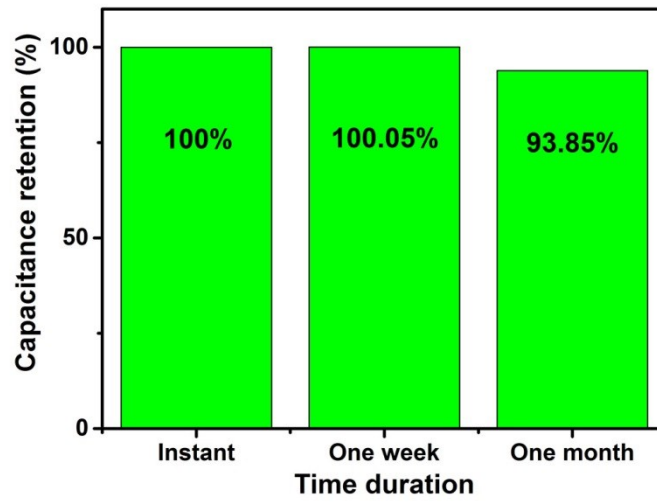

**Figure S28.** Capacitance retention calculated from GCD curves at  $1 \text{ mA cm}^{-2}$  of a SSC device at the bending angle of  $120^\circ$  after different time durations

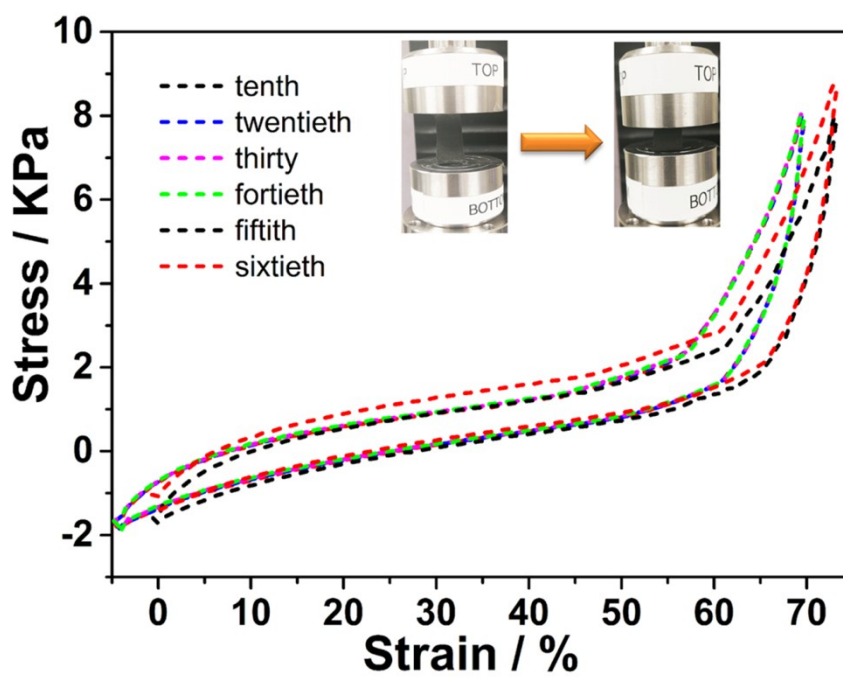

Figure S29. Compression cycles of the flexible solid-state supercapacitor

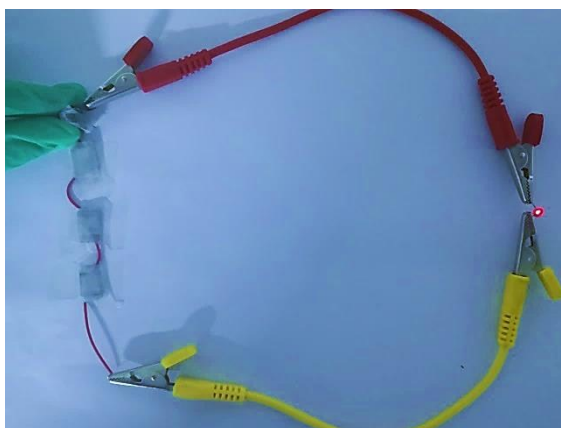

**Figure S30.** A red LED powered by four capacitors connected in series, in which one is in bending state

## Reference

- [1] D. Dubal, B. Ballesteros, A. Mohite, P. Gomezromero, Functionalization of polypyrrole nano-pipes with redox-active polyoxometalates (POMs) for ultrahigh energy density supercapacitors, *Chemsuschem*, 10 (2017) 731.
- [2] C. Yuyun, H. Min, T. Yujia, B. Jianchun, L. Shunli, L. Yaqian, D. Zhihui, Polypyrrole-polyoxometalate/reduced graphene oxide ternary nanohybrids for flexible, all-solid-state supercapacitors, *Chemical Communications*, 51 (2015) 12377-12380.
- [3] D. Hulicova, J. Yamashita, Y. Soneda, A. Hiroaki Hatori, M. Kodama, Supercapacitors prepared from melamine-based carbon, *Chemistry of Materials*, 17 (2005) 1241-1247.
- [4] J.W. To, Z. Chen, H. Yao, J. He, K. Kim, H.H. Chou, L. Pan, J. Wilcox, Y. Cui, Z. Bao, Ultrahigh surface area three-dimensional porous graphitic carbon from

conjugated polymeric molecular framework, *Acs Central Science*, 1 (2015) 68-76.

[5] R.L. Shuangshuang Zhang, Shiwen Li, Anne Dolbecq, Pierre Mialane, Lin Suo, Lihua Bi, Baofang Zhang, Tianbo Liu, Caixia Wu, Likai Yan, Zhongmin Su, Guangjin Zhang, Bineta Keitah, Simple and efficient polyoxomolybdate-mediated synthesis of novel graphene and metal nanohybrids for versatile applications, *Journal of Colloid and Interface Science*, 514 (2018) 507-516.

[6] H.N. Wang, M. Zhang, A.M. Zhang, F.C. Shen, X.K. Wang, S.N. Sun, Y.J. Chen, Y.Q. Lan, Polyoxometalate-based metal-organic frameworks with conductive polypyrrole for supercapacitors, *ACS Appl. Mater. Interfaces*, 10 (2018) 32265-32270.

[7] L. Lu, Y.B. Xie, Phosphomolybdic acid cluster bridging carbon dots and polyaniline nanofibers for effective electrochemical energy storage, *Journal of Materials Science*, 54 (2019) 4842-4858.

[8] L. Lu, Y.B. Xie, Fabrication and supercapacitor behavior of phosphomolybdic acid/polyaniline/titanium nitride core-shell nanowire array, *New J. Chem.*, 41 (2017) 335-346.

[9] H.Y. Chen, R. Al-Oweini, J. Friedl, C.Y. Lee, L. Li, U. Kortz, U. Stimming, M. Srinivasan, A novel SWCNT-polyoxometalate nanohybrid material as an electrode for electrochemical supercapacitors, *Nanoscale*, 7 (2015) 7934-7941.

[10] M.H. Yang, B.G. Choi, S.C. Jung, Y.y. Han, B.L. Sang, Polyoxometalate-coupled graphene via polymeric ionic liquid linker for supercapacitors, *Advanced Functional Materials*, 24 (2015) 7301-7309.

[11] S. Chen, Y. Xiang, M.K. Banks, C. Peng, W. Xu, R. Wu, Polyoxometalate-

coupled MXene nanohybrid via poly(ionic liquid) linkers and its electrode for enhanced supercapacitive performance, *Nanoscale*, (2018).

[12] M. Genovese, K. Lian, Polyoxometalate modified pine cone biochar carbon for supercapacitor electrodes, *Journal of Materials Chemistry A*, 5 (2017).

[13] A. Cuentas-Gallegos, R. Martinez-Rosales, M. Baibarac, P. Gomez-Romero, M.E. Rincon, Electrochemical supercapacitors based on novel hybrid materials made of carbon nanotubes and polyoxometalates, *Electrochem. Commun.*, 9 (2007) 2088-2092.

[14] Z.M. Cui, C.X. Guo, W.Y. Yuan, C.M. Li, In situ synthesized heteropoly acid/polyaniline/graphene nanocomposites to simultaneously boost both double layer- and pseudo-capacitance for supercapacitors, *Physical Chemistry Chemical Physics*, 14 (2012) 12823-12828.

[15] D.P. Dubal, B. Ballesteros, A.A. Mohite, P. Gómez-Romero, Functionalization of polypyrrole nanopipes with redox-active polyoxometalates for high energy density supercapacitors, *Chemsuschem*, 10 (2017) 731.

[16] C. Hu, E. Zhao, N. Nitta, A. Magasinski, G. Berdichevsky, G. Yushin, Aqueous solutions of acidic ionic liquids for enhanced stability of polyoxometalate-carbon supercapacitor electrodes, *J. Power Sources*, 326 (2016) 569-574.

[17] C. Zhiming, G. Chun Xian, Y. Weiyong, L.C. Ming, In situ synthesized heteropoly acid/polyaniline/graphene nanocomposites to simultaneously boost both double layer- and pseudo-capacitance for supercapacitors, *Physical Chemistry Chemical Physics*, 14 (2012) 12823-12828.

- [18] J.P. Wang, X. Wang, D.W. Gu, C.H. Liu, L.J. Shen, Synthesis and characterization of polyoxometalate/graphene oxide nanocomposites for supercapacitor, *Ceram. Int.*, 44 (2018) 17492-17498.
- [19] M. Genovese, K. Lian, Ionic Liquid-derived Imidazolium cation linkers for the layer-by-layer assembly of polyoxometalate-MWCNT composite electrodes with high power capability, *ACS Appl Mater Interfaces*, 8 (2016) 19100-19109.
- [20] A. Manivel, A.M. Asiri, K.A. Alamry, T. Lana-Villarreal, S. Anandan, Interfacially synthesized PANi-PMo<sub>12</sub> hybrid material for supercapacitor applications, *Bull. Mat. Sci.*, 37 (2014) 861-869.
- [21] D.P. Dubal, N.R. Chodankar, A. Vinu, D.H. Kim, P. Gomez-Romero, Asymmetric supercapacitors based on reduced graphene oxide with different polyoxometalates as positive and negative electrodes, *Chemsuschem*, 10 (2017) 2742-2750.
- [22] J. Suarez-Guevara, V. Ruiz, P. Gomez-Romero, Stable graphene-polyoxometalate nanomaterials for application in hybrid supercapacitors, *Physical Chemistry Chemical Physics*, 16 (2014) 20411-20414.
- [23] J. Suarez-Guevara, V. Ruiz, P. Gomez-Romero, Hybrid energy storage: high voltage aqueous supercapacitors based on activated carbon-phosphotungstate hybrid materials, *J. Mater. Chem. A*, 2 (2014) 1014-1021.
- [24] R. Li, C.G. He, L. Cheng, G.Y. Lin, G.C. Wang, D. Slit, R.K.Y. Li, Y.K. Yang, Polyoxometalate-enabled photoreduction of graphene oxide to bioinspired nacre-like composite films for supercapacitor electrodes, *Compos. Pt. B-Eng.*, 121 (2017) 75-82.



- [25] G. Wang, T. Chen, X. Wang, H. Ma, H. Pang, G. Wang, T. Chen, X. Wang, H. Ma, H. Pang, A high-performance supercapacitor afforded by a high-connected keggin based 3D coordination polymer, *European Journal of Inorganic Chemistry*, 2017 (2017).
- [26] H.Y. Chen, G. Wee, R. Al-Oweini, J. Friedl, K.S. Tan, Y. Wang, C.L. Wong, U. Kortz, U. Stimming, M. Srinivasan, A polyoxovanadate as an advanced electrode material for supercapacitors, *Chemphyschem*, 15 (2014) 2162-2169.
- [27] A. Mu, J. Li, W. Chen, X. Sang, Z.M. Su, E. Wang, The composite material based on Dawson-type polyoxometalate and activated carbon as the supercapacitor electrode, *Inorganic Chemistry Communications*, 55 (2015) 149-152.
- [28] Y.H. Ding, J. Peng, H.Y. Lu, Y. Yuan, S.U. Khan, Tungsten addenda mixed heteropolymolybdates supported on functionalized graphene for high-performance aqueous supercapacitors, *Rsc Advances*, 6 (2016).
- [29] G. Wang, T. Chen, S. Li, H. Pang, H. Ma, A coordination polymer based on dinuclear (pyrazinyl tetrazolate) copper(ii) cations and Wells-Dawson anions for high-performance supercapacitor electrodes, *Dalton Trans*, 46 (2017) 10.1039.C1037DT02230A.
- [30] S. Chinnathambi, M. Ammam, A molecular hybrid polyoxometalate-organometallic moieties and its relevance to supercapacitors in physiological electrolytes, *Journal of Power Sources*, 284 (2015) 524-535.
- [31] A.A. Ensafi, E. Heydarisoureshjani, B. Rezaei,  $[PW_{11}MO_{39}]^{5-}$  decorated on Ru-reduced graphene oxide nanosheets, characterizations and application as a high

performance storage energy and oxygen reduction reaction, *Chemical Engineering Journal*, (2017) S1385894717314031.

[32] V. Ruiz, J. suárze-Guevara, P. Gomez-Romero, Hybrid electrodes based on polyoxometalate—carbon materials for electrochemical supercapacitors, *Electrochemistry Communications*, 24 (2012) 35-38.

[33] L.G. Nana Du, Lingyu Fan, Kai Yu, Huan Luo, Shengjie Pang, Jiaqian Gao, Zhuwu Zheng, Jinghua Lv, and Baibin Zhou, Nanocomposites Containing keggin anions anchored on pyrazine based frameworks for use as supercapacitors and photocatalysts, *ACS Applied Nano Materials*, DOI: 10.1021/acsanm.9b00409 (2019).

[34] M. Yang, S.B. Hong, J.H. Yoon, D.S. Kim, S.W. Jeong, D.E. Yoo, T.J. Lee, K.G. Lee, S.J. Lee, B.G. Choi, Fabrication of flexible, redoxable, and conductive nanopillar arrays with enhanced electrochemical performance, *ACS Appl Mater Interfaces*, 8 (2016) acsami.6b06579.

[35] L.C. Yina Dong, Weilin Chen, Xiaotao Zheng, Xinlong Wang, Enbo Wang, rGO functionalized with a highly electronegative Keplerate-Type polyoxometalate for high-energy-density aqueous asymmetric supercapacitors, *Chemistry -An Asian Journal*, 13 (2018) 3304-3313.

[36] J. Suárez-Guevara, V. Ruiz, P. Gómez-Romero, Stable graphene—polyoxometalate nanomaterials for application in hybrid supercapacitors, *Physical Chemistry Chemical Physics*, 16 (2014) 20411-20414.

[37] A.G. Dawid Pakulski, Włodzimierz Czepa, Zhaoyang Liu, Luca Ortolani, Vittorio Morandi, Violetta Patroniak, Artur Ciesielski, Paolo Samori, Novel Keplerate type

polyoxometalate-surfactant-graphene hybrids as advanced electrode materials for supercapacitors, *Energy Storage Materials*, 17 (2019) 186-193.

[38] X.W. Jipeng Wang, Dawei Gu, Changhua Liu, Linjiang Shen, Synthesis and characterization of polyoxometalate/graphene oxide nanocomposites for supercapacitor, *Ceramics International*, 44 (2018) 17492-17498.

[39] D. L. X. Z. H. C. J. L. Y. L. B. C. F. Q. S. H. F. Zhang, A high performance solid-state asymmetric supercapacitor based on Anderson-type polyoxometalate-doped graphene aerogel, *Research on Chemical Intermediates*, 45 (2019) 3237–3250.

[40] M. Skunik, M. Chojak, I.A. Rutkowska, P.J. Kulesza, Improved capacitance characteristics during electrochemical charging of carbon nanotubes modified with polyoxometallate monolayers, *Electrochim. Acta*, 53 (2008) 3862-3869.

[41] G.M. Suppes, C.G. Cameron, M.S. Freund, A Polypyrrole/phosphomolybdic acid vertical bar poly(3,4-ethylenedioxythiophene)/phosphotungstic acid asymmetric supercapacitor, *J. Electrochem. Soc.*, 157 (2010) A1030-A1034.

[42] P. Gómez-Romero, M. Chojak, K. Cuentas-Gallegos, J.A. Asensio, P.J. Kulesza, N. Casañ-Pastor, M. Lira-Cantú, Hybrid organic–inorganic nanocomposite materials for application in solid state electrochemical supercapacitors, *Electrochemistry Communications*, 5 (2003) 149-153.

[43] J.Q. Qin, F. Zhou, H. Xiao, R. Ren, Z.S. Wu, Mesoporous polypyrrole-based graphene nanosheets anchoring redox polyoxometalate for all-solid-state micro-supercapacitors with enhanced volumetric capacitance, *Sci. China-Mater.*, 61 (2018)

233-242.
